# Supplementary material for: Phase behavior of rounded hard-squares
Source: Royal Society of Chemistry journal article supplement (doi:10.1039/c2sm07428a), 2012-01-01
Supplement: c2sm07428a.pdf [file c2sm07428a.pdf]

# Phase behavior of rounded hard-squares

## (Supplementary Information)

Carlos Avendaño\* and Fernando A. Escobedo\*†

February 24, 2012

### 1 Simulation details and order parameters

The phase behavior of rounded-corner hard-squares (RCHS) was obtained using Monte Carlo (MC) simulations in the canonical  $NVT$ ,<sup>1,2</sup> isobaric-isothermal  $NPT$ <sup>2-5</sup> and isothermal-isostress  $N\sigma PT$ <sup>6</sup> ensembles. In the  $N\sigma PT$  ensemble the shape of the box is allowed to change, which makes it specially attractive for simulations of systems at high-densities in order to stabilize crystalline phases that might not be commensurable with square simulation cells. Compression and expansion runs were used to map out the EoS of RCHS as a function of the roundness of the system  $\zeta$ , which is defined as  $\zeta = \sigma/(L + \sigma)$ . The compression runs were started from a low density isotropic state, and the pressure was increased in a sequential manner. Expansion runs were started from perfect crystal structures, which were determined using the method of Filio *et al.*<sup>7</sup> In our simulations, a cycle is defined as  $N$  Monte Carlo moves, where  $N$  is the total number of particles. For the systems of  $N = 400$  and 1600 particles, particle translations, re-orientations, and box volume changes were chosen with probabilities of 47.5%, 47.5%, and 5%, respectively. Equal probabilities were used for isotropic and anisotropic changes of volume when required, i.e., 2.5% each. For the larger system of  $N = 4096$  particles, each cycle consists of 4096 particles translation or re-orientations, and approximately four box volume changes.  $2.5 \times 10^5$  MC cycles were used to equilibrate the system, followed by  $1 \times 10^6$  production cycles to obtain ensemble averages. In the case of  $NVT$  simulations, translation and rotations moves were chosen with equal probability (50% each one).  $NVT$  simulations were only used for systems of 5625 particles, hence longer simulations were required in order to equilibrate the system. In this case  $1 \times 10^6$  cycles were used to stabilize the system, followed by  $2 \times 10^6$  cycles to obtain ensemble averages. In all cases, the allowed displacements, re-orientations, and volume changes were adjusted to get acceptance probabilities between 30-40% (with the exception of the results presented in Fig. S15, where the re-orientation

\*Chemical and Biomolecular Engineering, Cornell University, Ithaca, New York 14853, USA.

†E-mail: fe13@cornell.edu

moves were restricted to be less than  $5^\circ$ ). In order to characterize the system, several order parameters (that have been defined in the main article) were calculated. We also report the results for the isothermal compressibility  $\kappa_T^* = \kappa_T k_B T / A_p$  calculated from fluctuations of the total area of the system.<sup>8</sup>

In the figures shown below, we have used the following acronyms for the different phases: I=isotropic, RHX=hexagonal rotator crystal, RB= rhombic, T=tetragonal, and PC=polycrystalline.

## 2 Results for perfect hard squares using $N=196$ particles

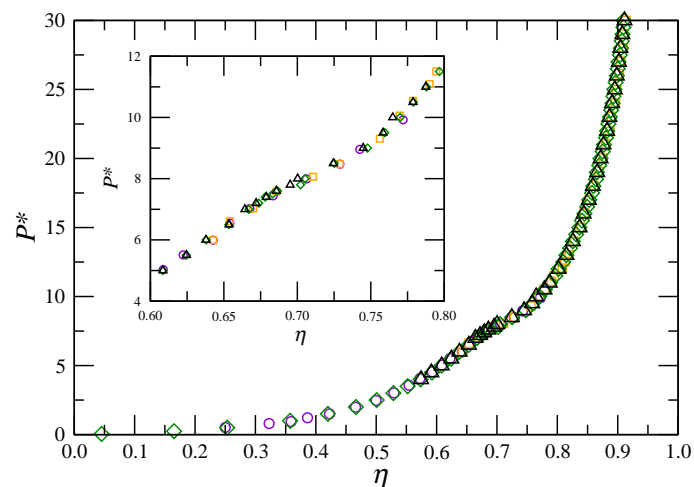

Figure S1: Equation of state for 196 RCHS with  $\zeta = 0.01$  obtained by compression ( $\diamond$ ) and expansion ( $\triangle$ ) runs. The results are compared with the simulations results of the system of 196 perfect hard-squares reported by Wojciechowski and Frenkel<sup>9</sup> obtained by compression ( $\circ$ ) and expansion ( $\square$ ) runs .

| $P^*$ | $N = 196$            |                     |                      |
|-------|----------------------|---------------------|----------------------|
|       | $\eta$ (compression) | $\eta$ (expansion)  | $\eta$ (reference 9) |
| 20.0  | $0.8715 \pm 0.0023$  | $0.8716 \pm 0.0018$ | 0.8715               |
| 15.0  | $0.8365 \pm 0.0033$  | $0.8370 \pm 0.0021$ | 0.8362               |
| 12.0  | $0.8019 \pm 0.0030$  | $0.8020 \pm 0.0024$ | 0.8010               |
| 10.0  | $0.7699 \pm 0.0044$  | $0.7649 \pm 0.0048$ | 0.7689               |
| 9.0   | $0.7478 \pm 0.0046$  | $0.7448 \pm 0.0054$ | 0.7444               |
| 8.5   | $0.7251 \pm 0.0066$  | $0.7187 \pm 0.0111$ | 0.7294               |
| 8.0   | $0.7052 \pm 0.0082$  | $0.7002 \pm 0.0063$ | 0.7030               |
| 7.8   | $0.7022 \pm 0.0087$  | $0.6951 \pm 0.0060$ | 0.6926               |
| 7.6   | $0.6865 \pm 0.0047$  | $0.6857 \pm 0.0098$ | 0.6857               |
| 7.4   | $0.6781 \pm 0.0042$  | $0.6789 \pm 0.0077$ | 0.6772               |
| 7.0   | $0.6670 \pm 0.0043$  | $0.6643 \pm 0.0073$ | 0.6660               |
| 6.0   | $0.6380 \pm 0.0030$  | $0.6378 \pm 0.0030$ | 0.6379               |
| 4.0   | $0.5734 \pm 0.0028$  | $0.5742 \pm 0.0018$ | 0.5725               |
| 2.5   | $0.5008 \pm 0.0021$  | —                   | 0.5027               |

Table S1: Monte Carlo simulation results for 196 RCHS with  $\zeta = 0.01$  obtained by compression and expansion runs. The results are compared with the simulations results of the system of 196 perfect hard-squares reported by Wojciechowski and Frenkel.<sup>9</sup>

### 3 Results for RCHS with $L^* = 0.25$ ( $\zeta = 0.8$ )

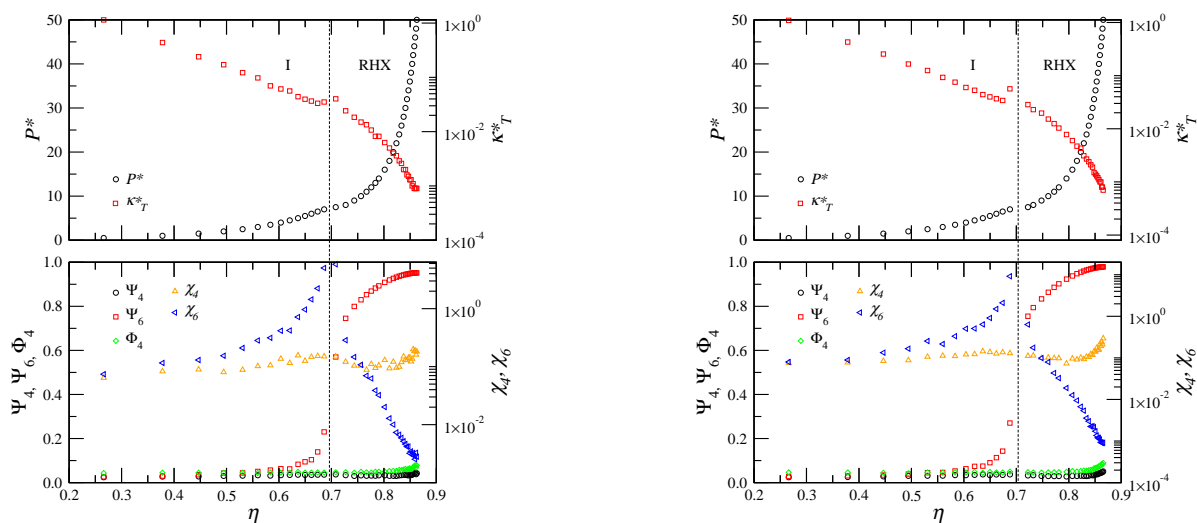

Figure S2: Equation of state for 400 RCHS with  $L^* = 0.25$  ( $\zeta = 0.8$ ) obtained by compression (left panel) and expansion (right panel) runs. (Top panel) The pressure,  $P^*$ , and the isothermal compressibility,  $\kappa_T^*$ , as a function of the packing fraction  $\eta$ . (Bottom panel) Bond orientational order parameters,  $\Psi_4$  and  $\Psi_6$ , orientational order parameter,  $\Phi_4$ , and susceptibilities of the bond-order parameters,  $\chi_4$  and  $\chi_6$ , as a function of  $\eta$ . Vertical dashed-lines are used to delimit the different phases.

#### 4 Results for RCHS with $L^* = 0.50$ ( $\zeta = 0.667$ )

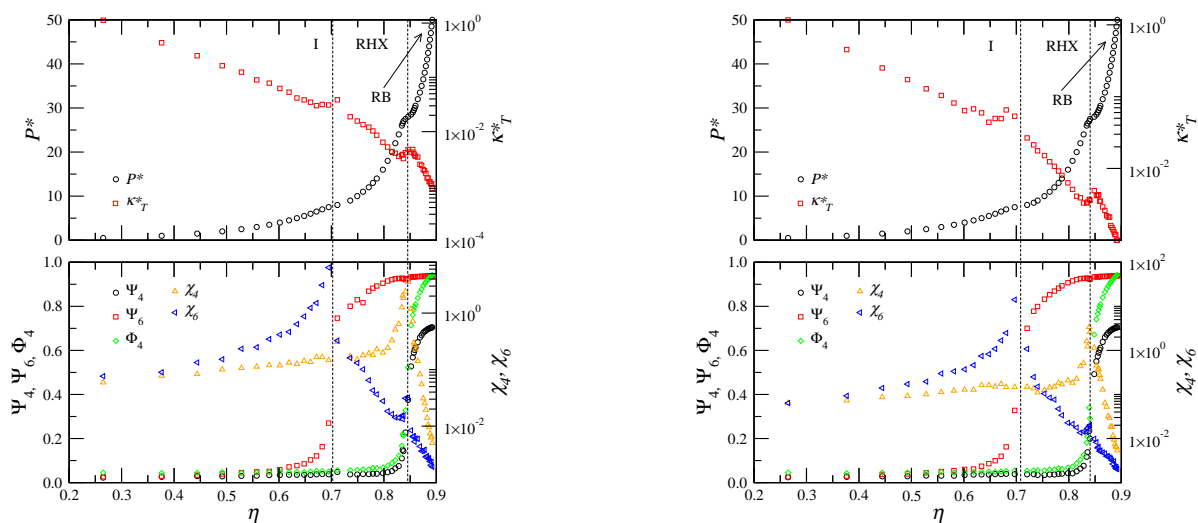

Figure S3: Equation of state for 400 RCHS with  $L^* = 0.50$  ( $\zeta = 0.667$ ) obtained by compression (left panel) and expansion (right panel) runs. Legend as in Fig. S2.

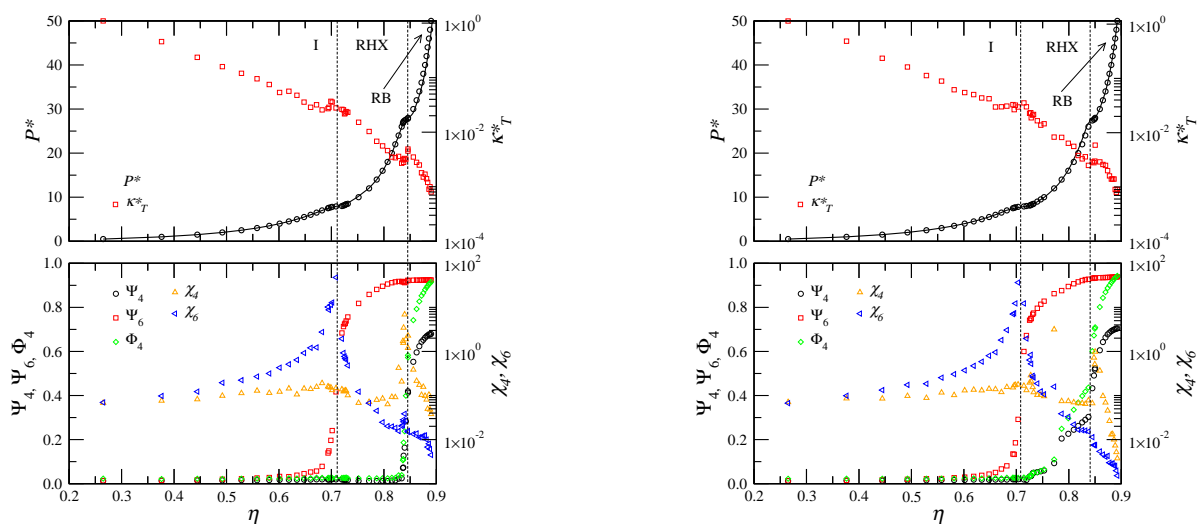

Figure S4: Equation of state for 1600 RCHS with  $L^* = 0.50$  ( $\zeta = 0.667$ ) obtained by compression (left panel) and expansion (right panel) runs. Legend as in Fig. S2.

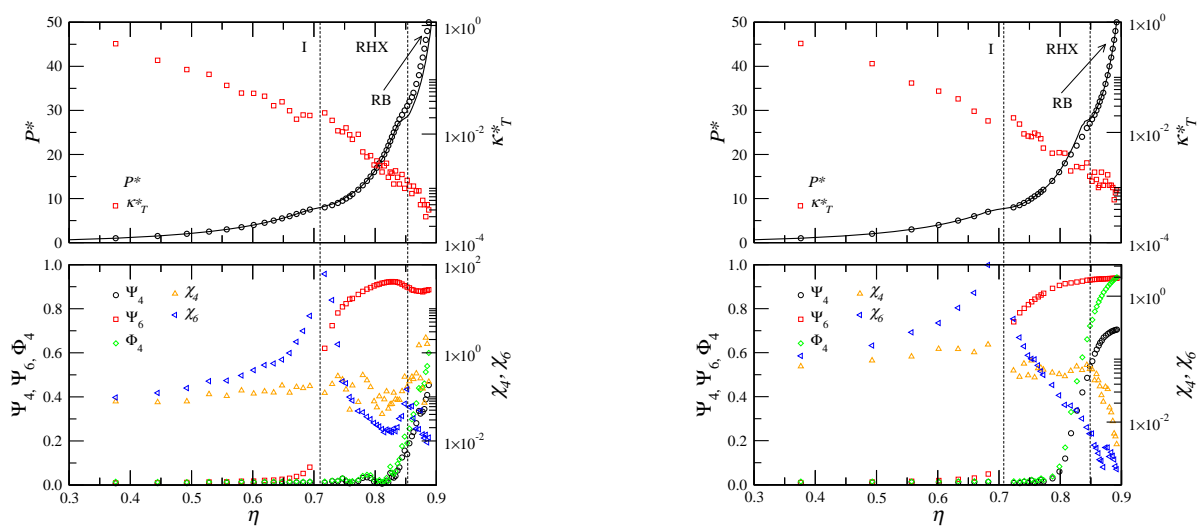

Figure S5: Equation of state for 4096 RCHS with  $L^* = 0.50$  ( $\zeta = 0.667$ ) obtained by compression (left panel) and expansion (right panel) runs. Legend as in Fig. S2.

## 5 Results for RCHS with $L^* = 0.75$ ( $\zeta = 0.571$ )

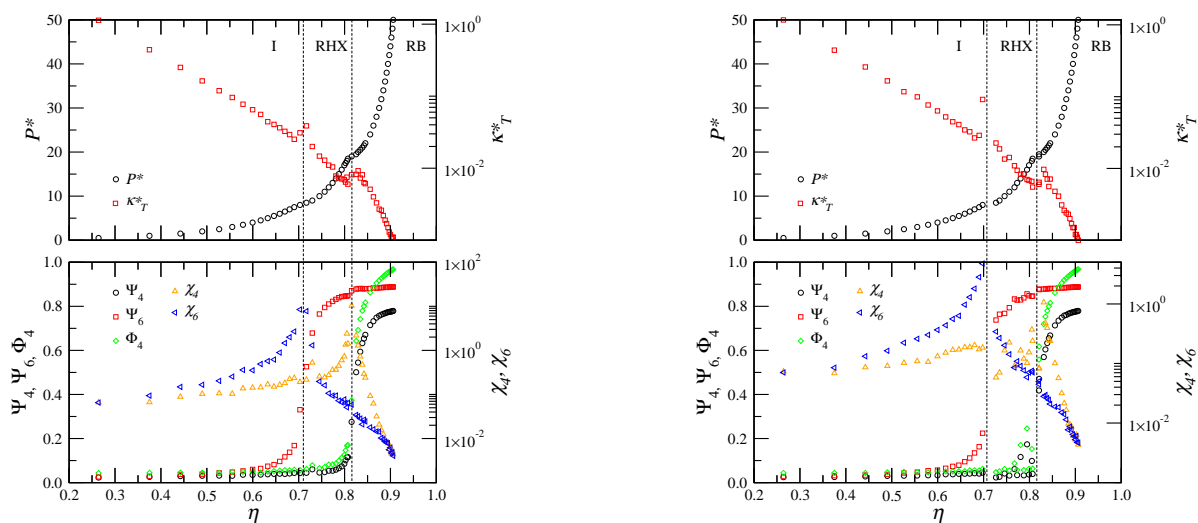

Figure S6: Equation of state for 400 RCHS with  $L^* = 0.75$  ( $\zeta = 0.571$ ) obtained by compression (left panel) and expansion (right panel) runs. Legend as in Fig. S2.

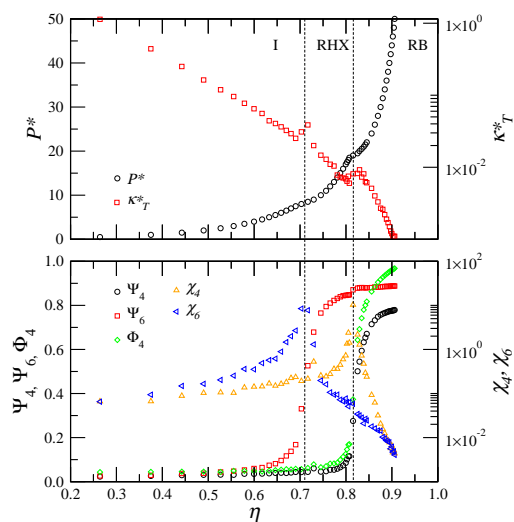

Figure S7: Equation of state for 1600 RCHS with  $L^* = 0.75$  ( $\zeta = 0.571$ ) obtained by compression runs. Legend as in Fig. S2.

## 6 Results for RCHS with $L^* = 1.00$ ( $\zeta = 0.5$ )

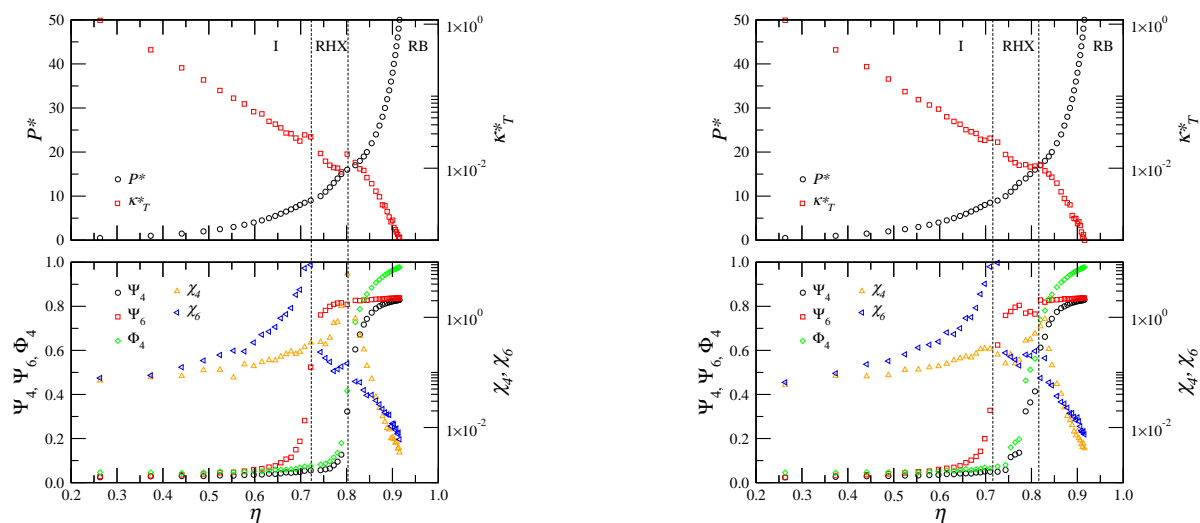

Figure S8: Equation of state for 400 RCHS with  $L^* = 1.00$  ( $\zeta = 0.5$ ) obtained by compression (left panel) and expansion (right panel) runs. Legend as in Fig. S2.



## 7 Results for RCHS with $L^* = 1.25$ ( $\zeta = 0.444$ )

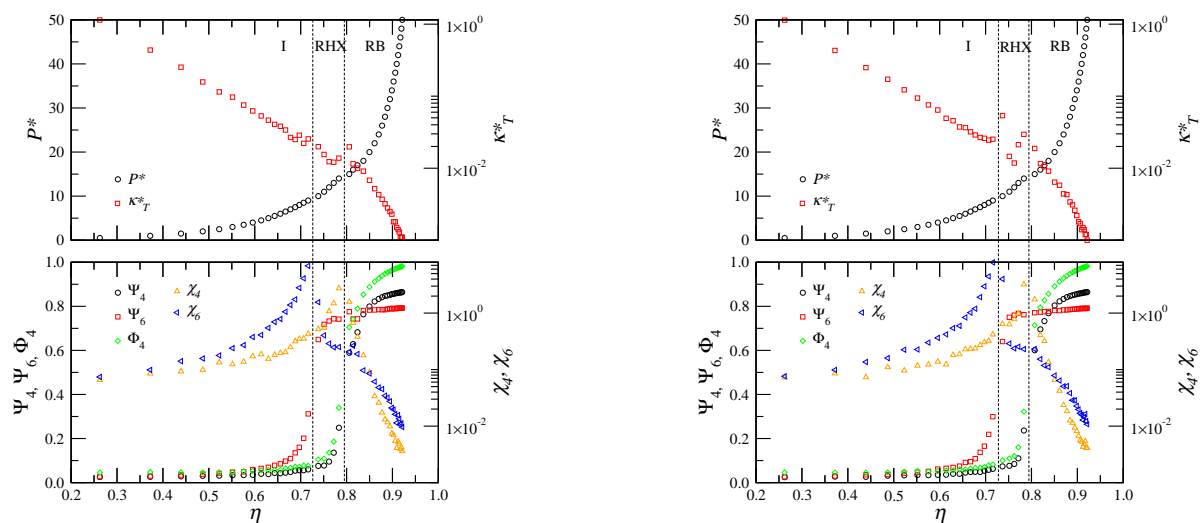

Figure S9: Equation of state for 400 RCHS with  $L^* = 1.25$  ( $\zeta = 0.444$ ) obtained by compression (left panel) and expansion (right panel) runs. Legend as in Fig. S2.

## 8 Results for RCHS with $L^* = 1.50$ ( $\zeta = 0.400$ )

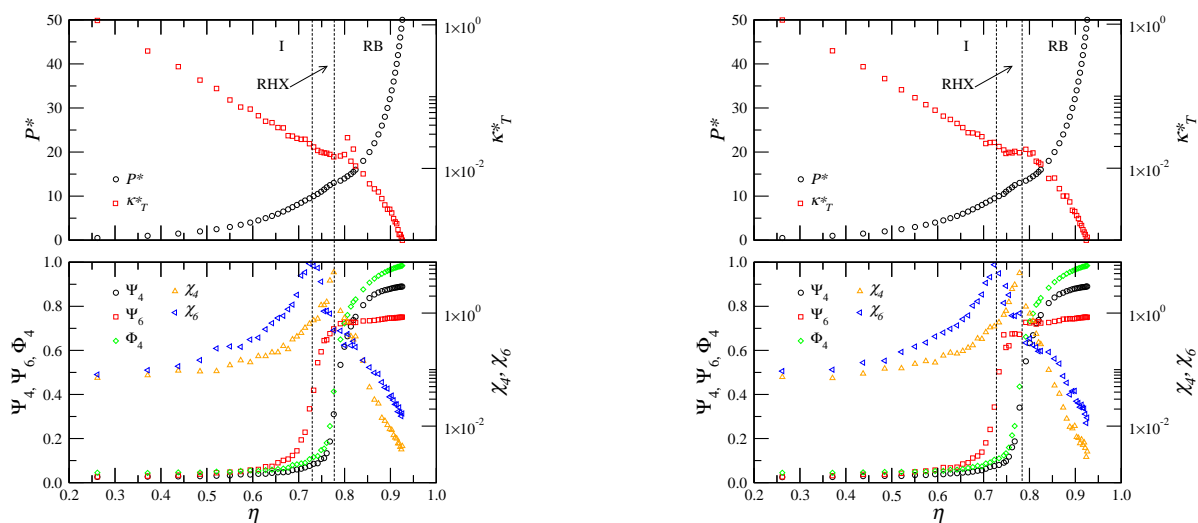

Figure S10: Equation of state for 400 RCHS with  $L^* = 1.50$  ( $\zeta = 0.400$ ) obtained by compression (left panel) and expansion (right panel) runs. Legend as in Fig. S2.

## 9 Results for RCHS with $L^* = 1.75$

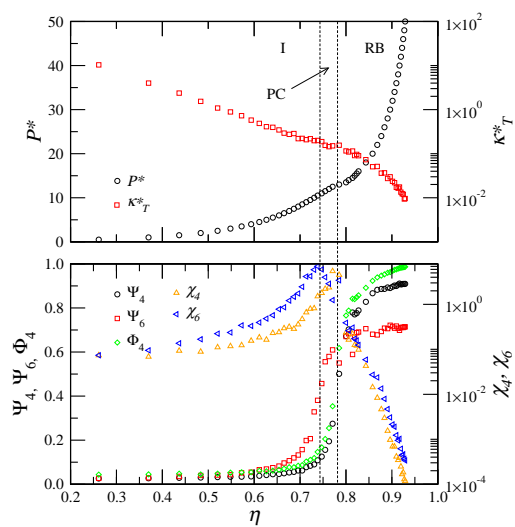

Figure S11: Equation of state for 400 RCHS with  $L^* = 1.75$  ( $\zeta = 0.364$ ) obtained by compression runs. Legend as in Fig. S2.

## 10 Results for RCHS with $L^* = 2.00$

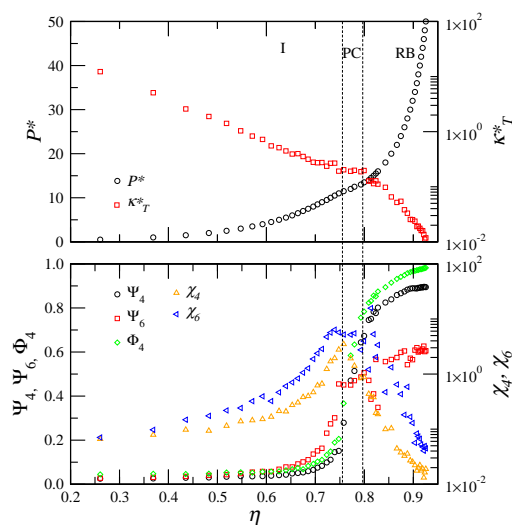

Figure S12: Equation of state for 400 RCHS with  $L^* = 2.00$  ( $\zeta = 0.333$ ) obtained by compression runs. Legend as in Fig. S2.

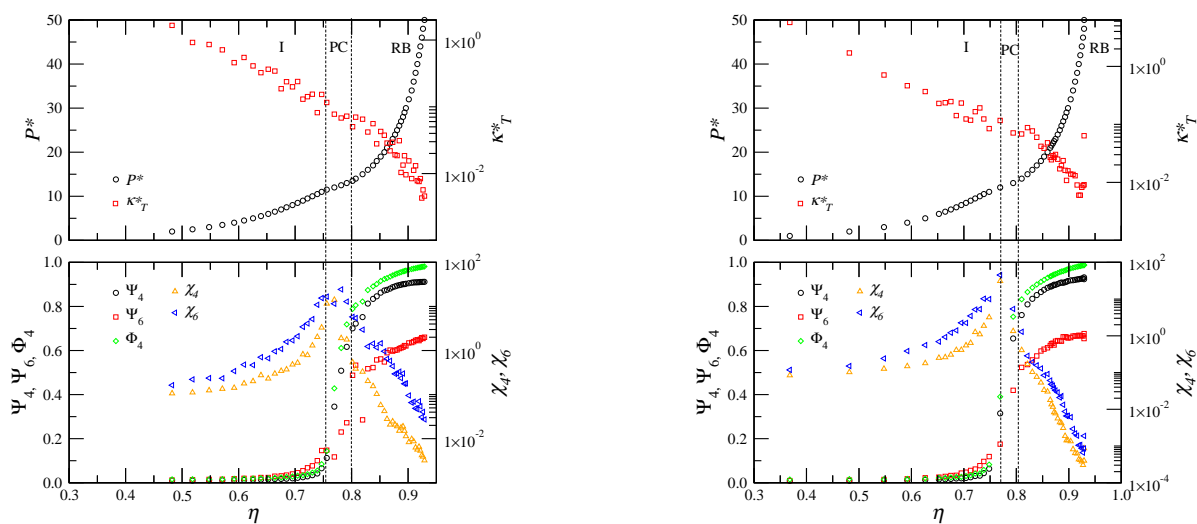

Figure S13: Equation of state for 4096 RCHS with  $L^* = 2.00$  ( $\zeta = 0.333$ ) obtained by compression (left panel) and expansion (right panel) runs. Legend as in Fig. S2.

## 11 Results for RCHS with $L^* = 2.25$ ( $\zeta = 0.308$ )

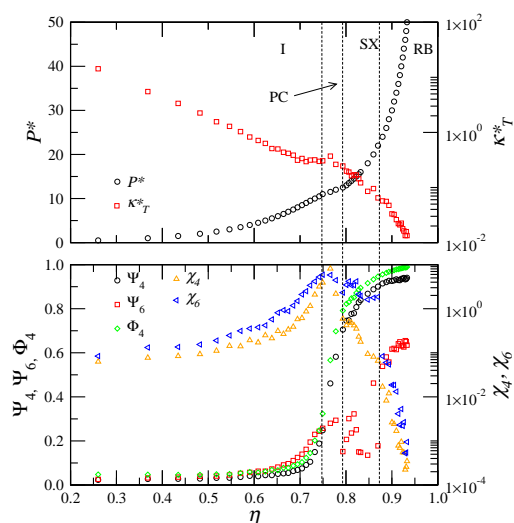

Figure S14: Equation of state for 400 RCHS with  $L^* = 2.25$  ( $\zeta = 0.308$ ) obtained by compression runs. Legend as in Fig. S2.

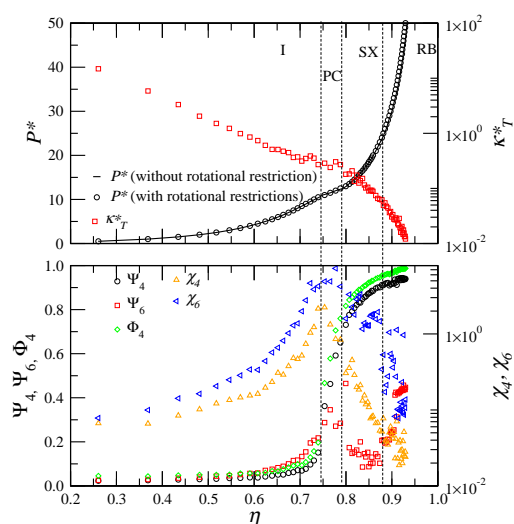

Figure S15: Equation of state for 400 RCHS with  $L^* = 2.25$  ( $\zeta = 0.308$ ) obtained by compression runs. During the simulations, only re-orientations of less than  $5^\circ$  were allowed. The EoS for the system without restrictions during the rotational moves (S14) is shown (continuous curve) for comparison. Legend as in Fig. S2.

## 12 Results for RCHS with $L^* = 2.50$ ( $\zeta = 0.286$ )

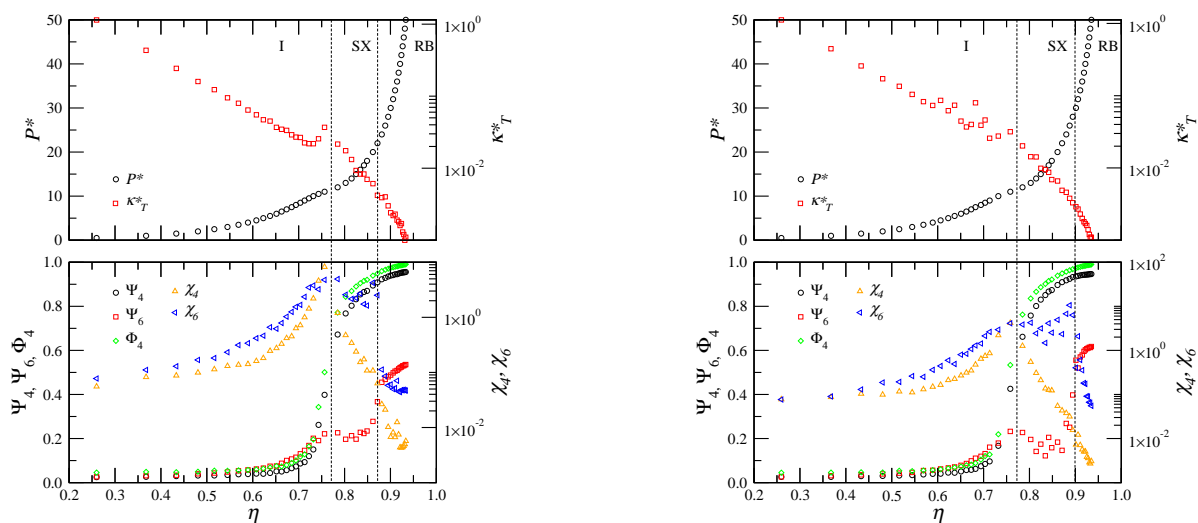

Figure S16: Equation of state for 400 RCHS with  $L^* = 2.50$  ( $\zeta = 0.286$ ) obtained by compression (left panel) and expansion (right panel) runs. Legend as in Fig. S2.

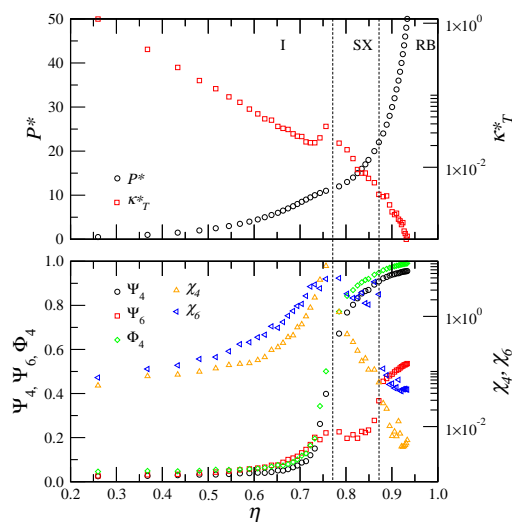

Figure S17: Equation of state for 1600 RCHS with  $L^* = 2.50$  ( $\zeta = 0.286$ ) obtained by compression runs. Legend as in Fig. S2.

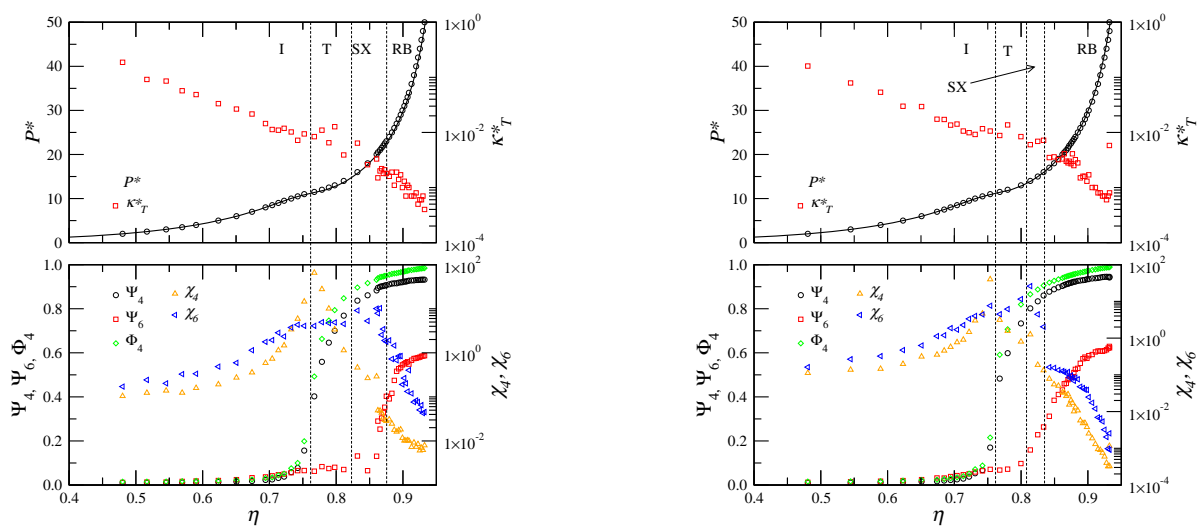

Figure S18: Equation of state for 4096 RCHS with  $L^* = 2.50$  ( $\zeta = 0.286$ ) obtained by compression (left panel) and expansion (right panel) runs. Legend as in Fig. S2.

### 13 Results for RCHS with $L^* = 3.00$ ( $\zeta = 0.25$ )

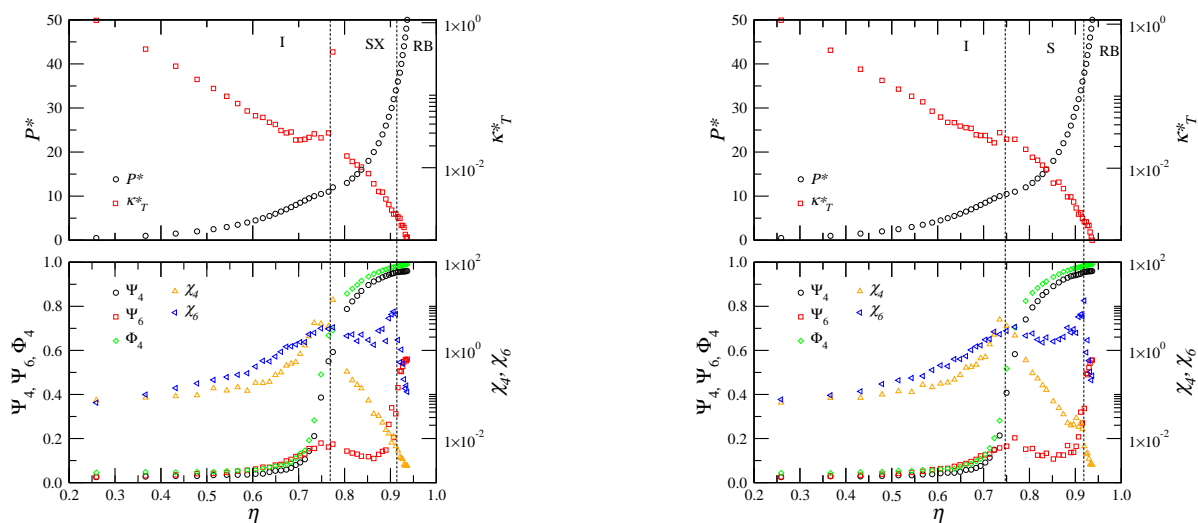

Figure S19: Equation of state for 400 RCHS with  $L^* = 3.0$  ( $\zeta = 0.25$ ) obtained by compression (left panel) and expansion (right panel) runs. Legend as in Fig. S2.



## 14 Results for RCHS with $L^* = 5.00$

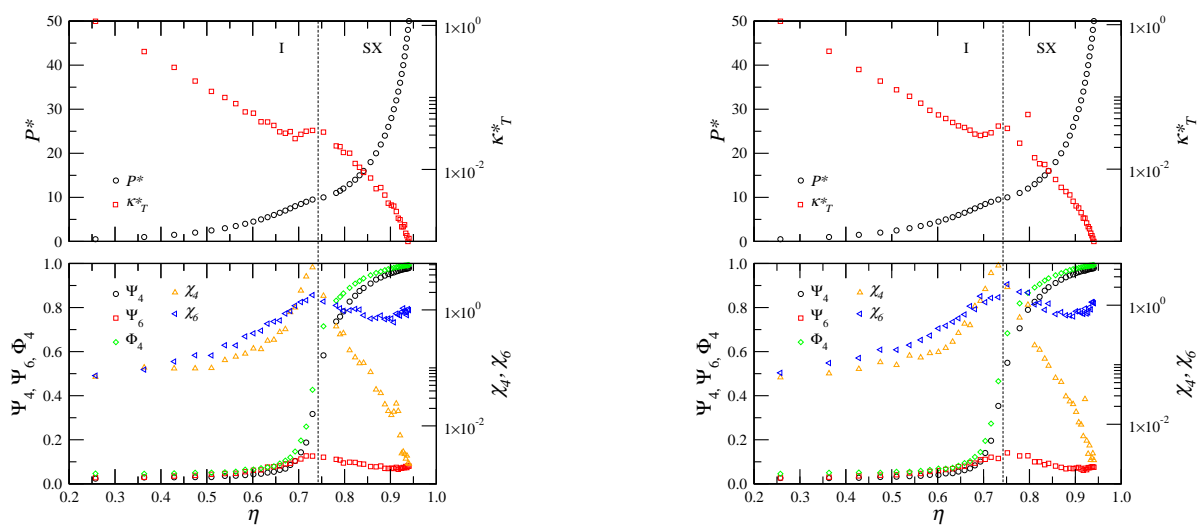

Figure S20: Equation of state for 400 RCHS with  $L^* = 5.0$  ( $\zeta = 0.167$ ) obtained by compression (left panel) and expansion (right panel) runs. Legend as in Fig. S2.

## 15 Results for RCHS with $L^* = 10.00$ ( $\zeta = 0.09$ )

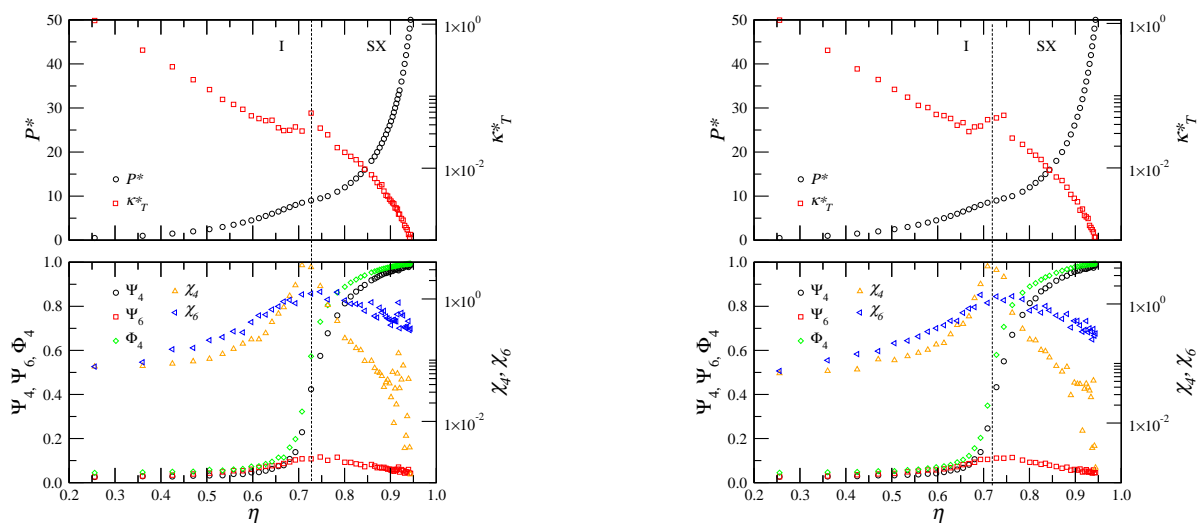

Figure S21: Equation of state for 400 RCHS with  $L^* = 10.0$  ( $\zeta = 0.09$ ) obtained by compression (left panel) and expansion (right panel) runs. Legend as in Fig. S2.

## 16 Results for RCHS with $L^* = 100.00$ ( $\zeta = 0.01$ )

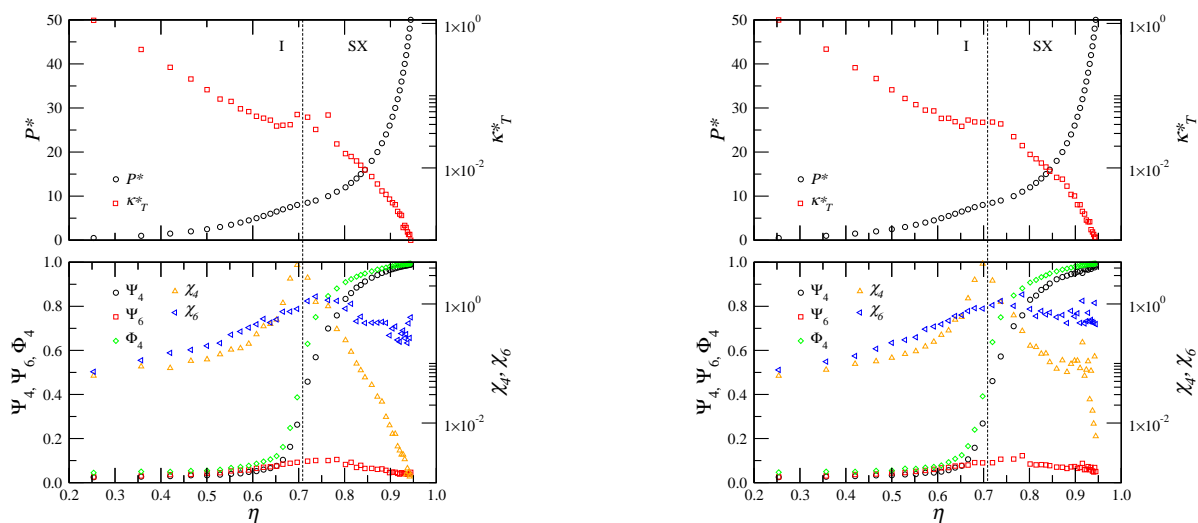

Figure S22: Equation of state for 400 RCHS with  $L^* = 100.0$  ( $\zeta = 0.01$ ) obtained by compression (left panel) and expansion (right panel) runs. Legend as in Fig. S2.

## 17 Lattice angles for the densest rhombic phase

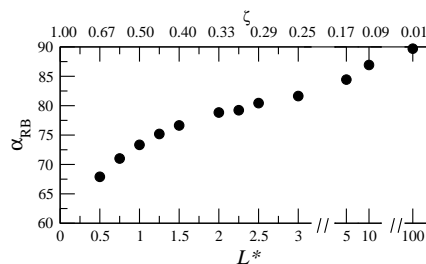

Figure S23: Lattice angle of the densest rhombic phase as a function of  $L^*$  ( $\zeta$ ), obtained from the simulations of RCHS using the method of Filio *et al.*<sup>7</sup> employing four particles.

## References

- [1] N. Metropolis, A. W. Rosenbluth, M. N. Rosenbluth, A. H. Teller and E. Teller, *J. Chem. Phys.*, 1953, **21**, 1087.
- [2] D. Frenkel and B. Smit, *Understanding Molecular Simulation*, Academic Press, London, 2nd edn., 2002.
- [3] W. W. Wood, *J. Chem. Phys.*, 1968, **48**, 415.
- [4] W. W. Wood, *J. Chem. Phys.*, 1970, **52**, 729.
- [5] D. P. Landau and K. Binder, *A Guide to Monte Carlo Simulations in Statistical Physics*, Cambridge University Press, Cambridge, UK, 2nd edn., 2005.
- [6] M. Parrinello and A. Rahman, *J. Appl. Phys.*, 1981, **52**, 7182.
- [7] L. Filion, M. Marechal, B. van Oorschot, D. Pelt, F. Smallenburg and M. Dijkstra, *Phys. Rev. Lett.*, 2009, **103**, 188302.
- [8] M. Lagache, P. Ungerer, A. Boutin and A. H. Fuchs, *Phys. Chem. Chem. Phys.*, 2001, **3**, 4333.
- [9] K. W. Wojciechowski and D. Frenkel, *Comp. Met. Sci. Technol.*, 2004, **10**, 235.
